# Supplementary material for: On the feasibility of using TCR sequencing to follow a vaccination response – lessons learned
Source: PubMed Central journal article supplement (PMC10374308; doi:10.3389/fimmu.2023.1210168), 2023-07-13
Supplement: Table_1.pdf [file Table_1.pdf]

**Table S1. Donor characteristics**

| Donor ID | Age (years) | Sex | CMV status | Timing follow-up sample | Comments                                   |
|----------|-------------|-----|------------|-------------------------|--------------------------------------------|
| 1        | 70          | M   | CMV-       | 6.5 months              |                                            |
| 17       | 73          | F   | CMV-       | 4.4 months              |                                            |
| 72       | 71          | F   | CMV-       | 6.5 months              |                                            |
| 105      | 68          | M   | CMV-       | 5.5 months              |                                            |
| 145      | 69          | F   | CMV-       | 6.2 months              | Sequenced twice                            |
| 157      | 27          | M   | CMV-       | 6.9 months              |                                            |
| 203      | 38          | F   | CMV+       | 7.7 months              |                                            |
| 204      | 25          | F   | CMV-       | 6.0 months              | Illumina NextSeq; 3 samples per time point |
| 264      | 27          | F   | CMV-       | 6.8 months              |                                            |
| 273      | 31          | M   | CMV-       | 5.7 months              |                                            |
| 292      | 28          | F   | CMV+       | 6.5 months              | Illumina NextSeq; 3 samples per time point |
| 310      | 30          | F   | CMV-       | 5.4 months              |                                            |
| 311      | 25          | F   | CMV-       | 5.5 months              |                                            |
